# Supplementary material for: A multibranched carbazole linked triazine based fluorescent molecule for the selective detection of picric acid
Source: Royal Society of Chemistry journal article supplement (doi:10.1039/c6ra22632a), 2016-01-01
Supplement: c6ra22632a1.pdf [file c6ra22632a1.pdf]

## Supporting information

# Multibranch carbazole linked triazine based fluorescent molecules for selective detection of picric acid

Govindasamy Sathiyana<sup>a\*</sup> and Pachagounder Sakhivel<sup>a\*</sup>

<sup>a</sup>Department of Chemistry, School of Advanced Sciences, VIT University, Vellore, Tamil Nadu, India-632 014.

Corresponding author. E-mail: [sakhivel.p@vit.ac.in](mailto:sakhivel.p@vit.ac.in) (or) [polysathi@gmail.com](mailto:polysathi@gmail.com)  
[sathiyansiva91@gmail.com](mailto:sathiyansiva91@gmail.com)

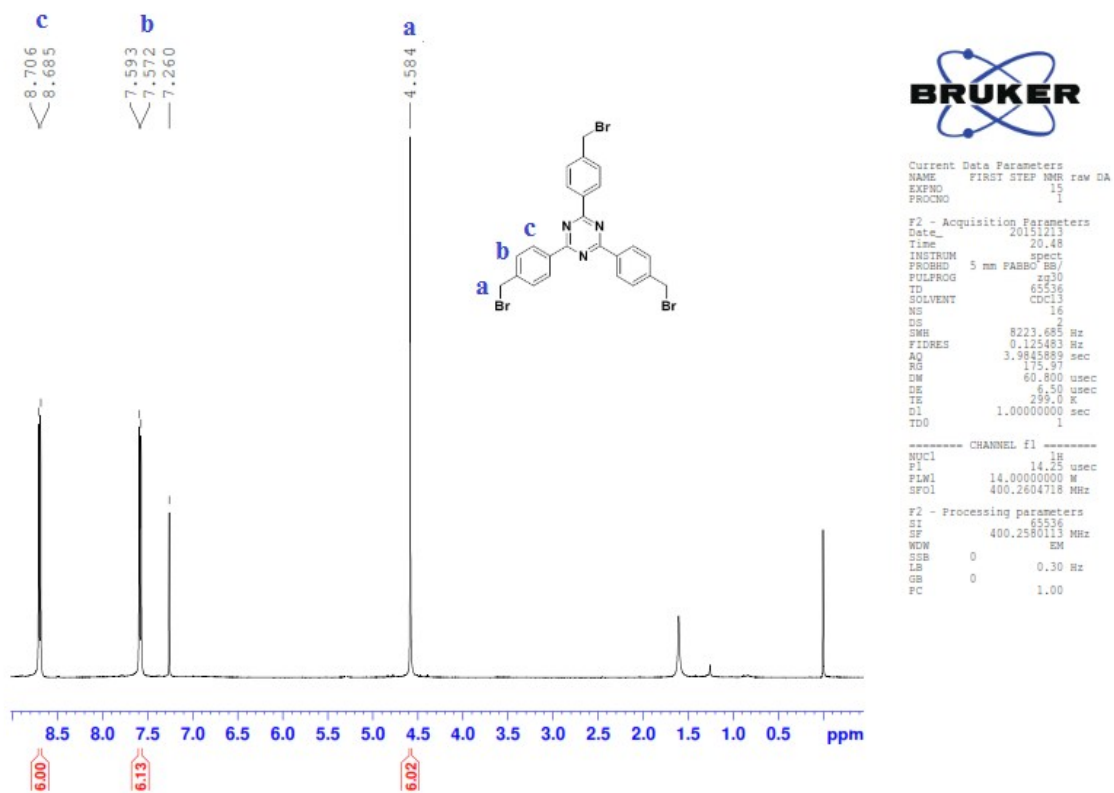

**Fig. S1** <sup>1</sup>H-NMR spectrum of 2,4,6-tris(4-(bromomethyl)phenyl)-1,3,5-triazine (1)

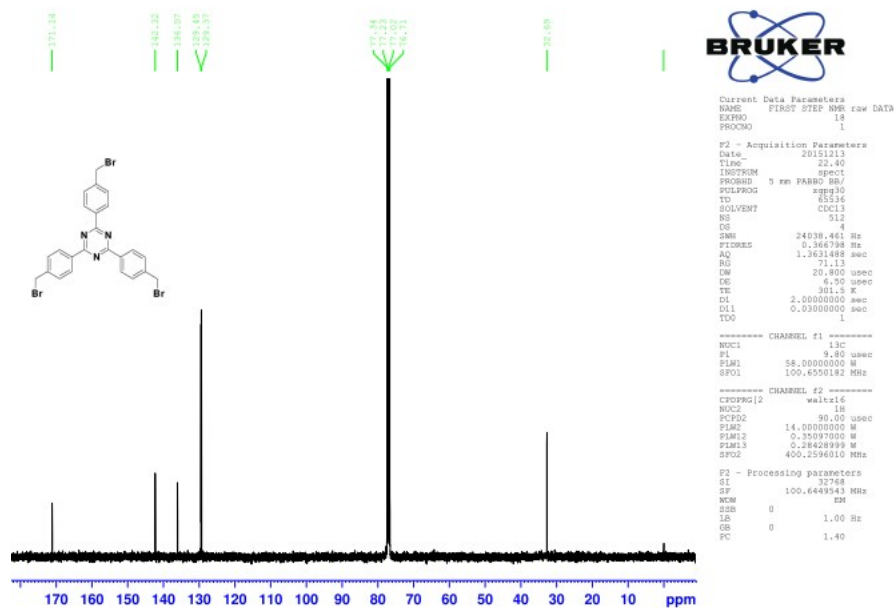

Fig. S2  $^{13}\text{C}$ -NMR spectrum of 2,4,6-tris(4-(bromomethyl)phenyl)-1,3,5-triazine (1)

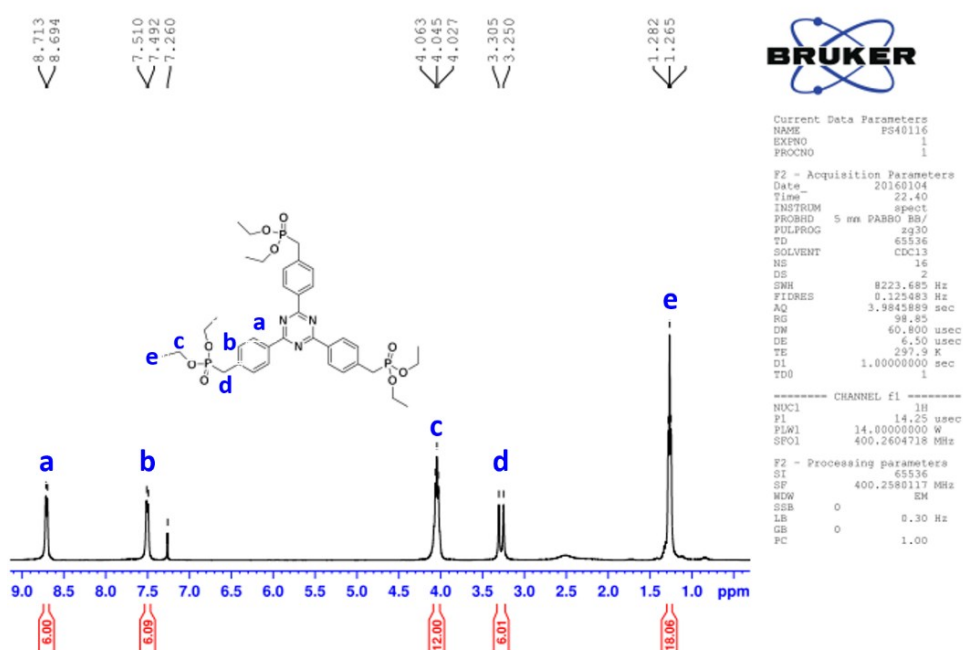

Fig. S3  $^1\text{H}$ -NMR spectrum of 2,4,6-tris[4-(diethylphosphonomethyl)phenyl]-1,3,5-triazine (TRZ)

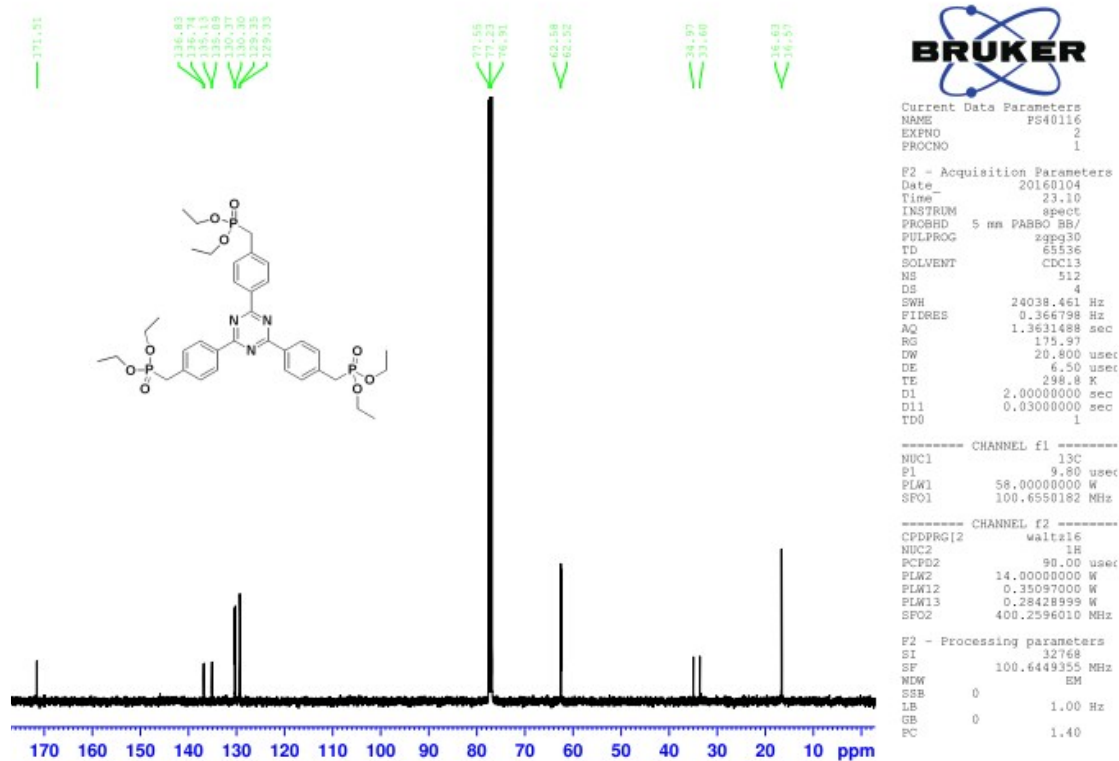

**Fig. S4**  $^{13}\text{C}$ -NMR spectrum of 2,4,6-tris[4-(diethylphosphonomethyl)phenyl]-1,3,5-triazine (TRZ)

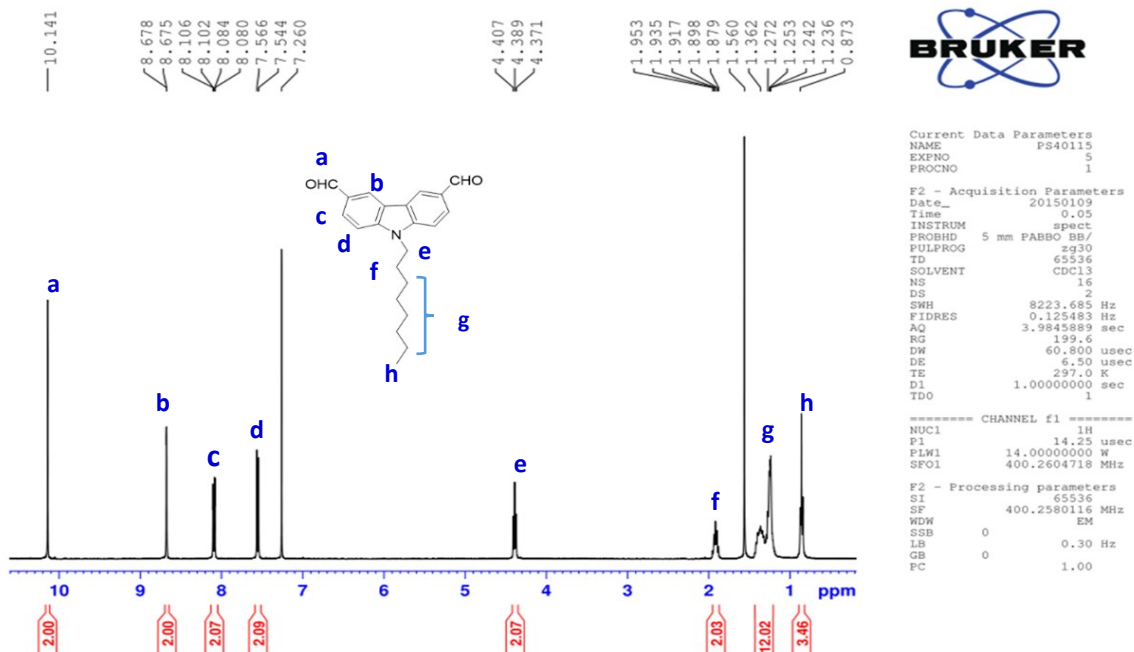

**Fig. S5**  $^1\text{H}$ -NMR spectrum of Cz-octyl

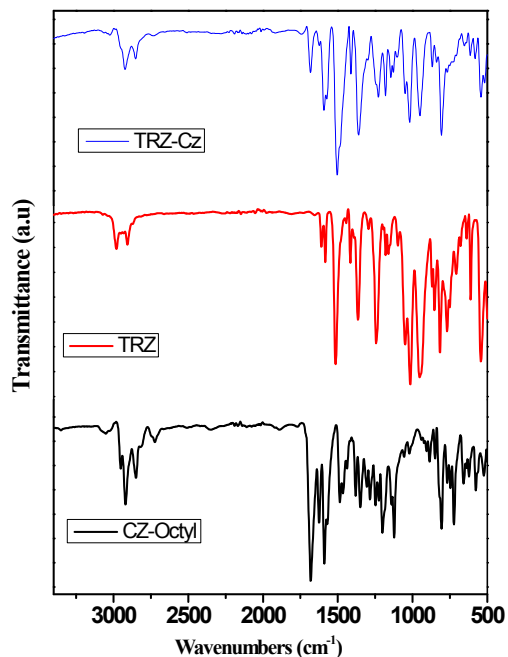

Fig. S6 FT-IR spectra of TRZ-Cz, TRZ and Cz-Octyl

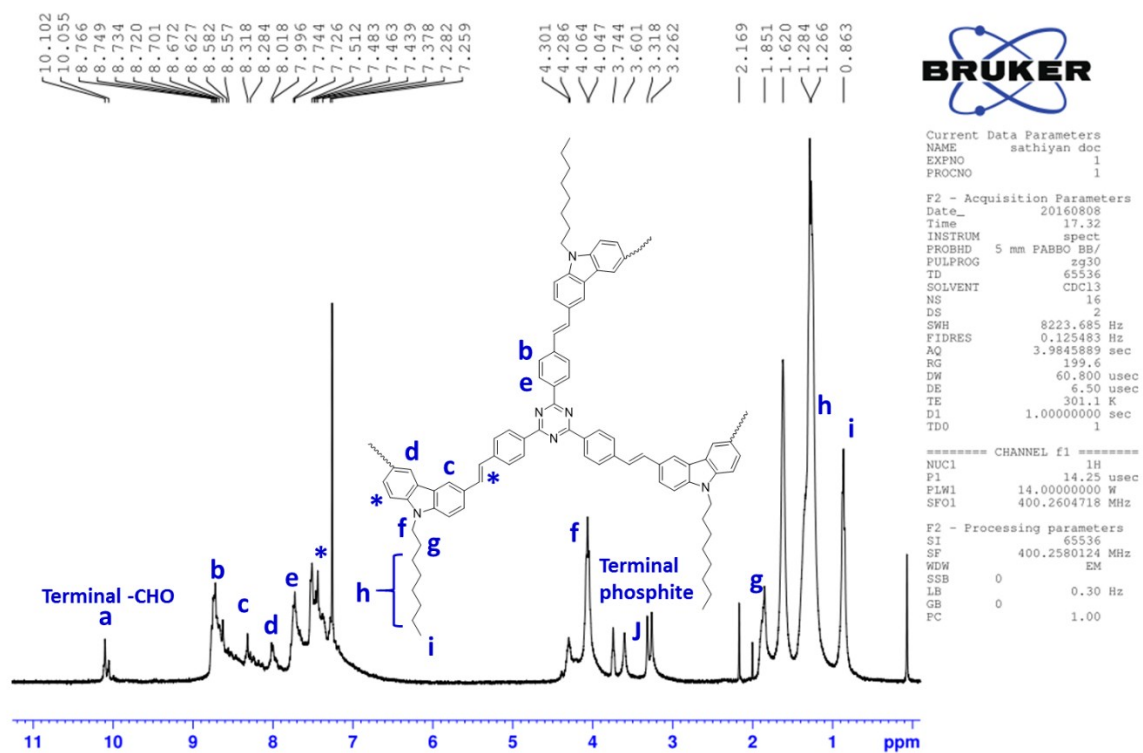

Fig. S7 <sup>1</sup>H-NMR spectrum of TRZ-Cz

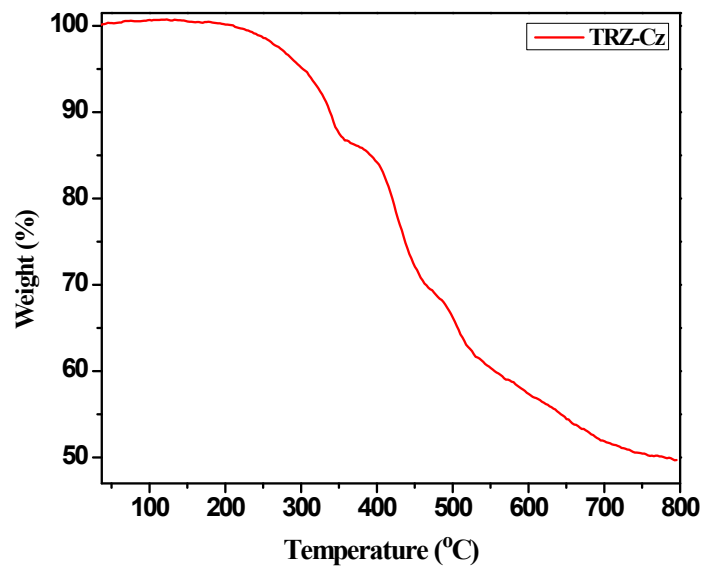

Fig. S8 TGA curve of TRZ-Cz

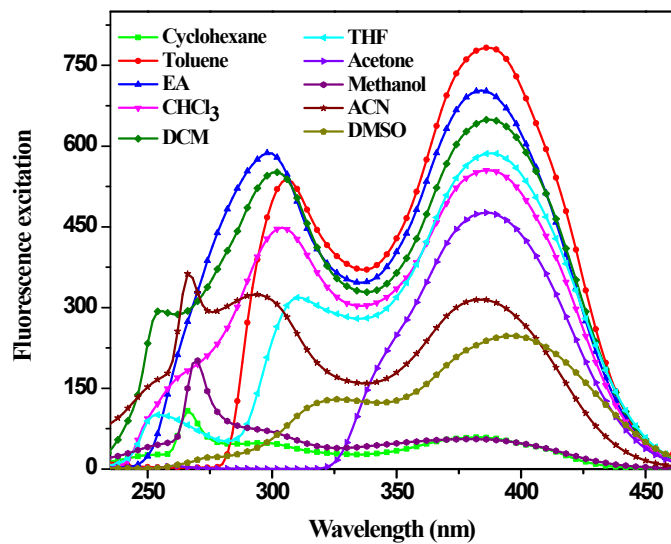

Fig. S9 Fluorescence excitation spectra of TRZ-Cz in different solvents

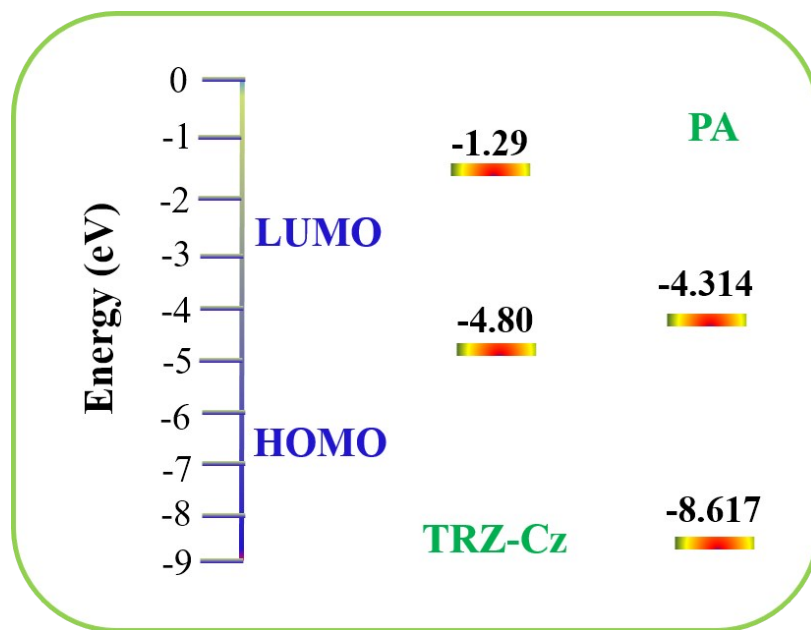

Fig. S10 HOMO, LUMO energy level of TRZ-Cz and PA

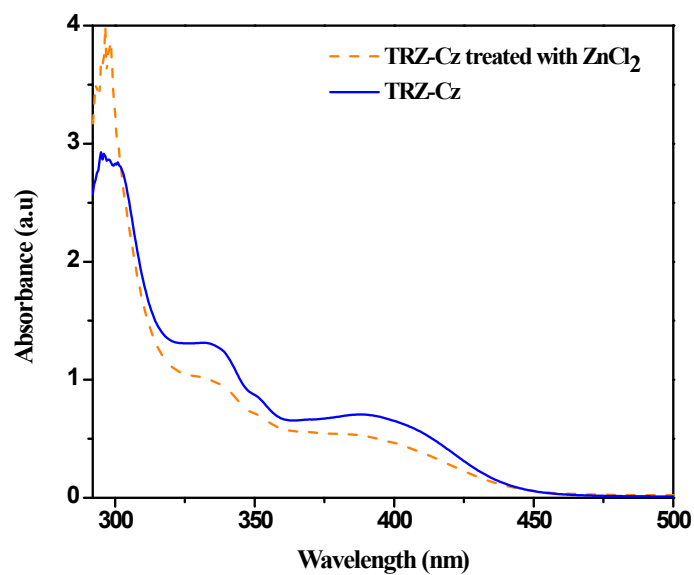

Fig. S11 UV-vis spectra of before and after treatment of  $\text{ZnCl}_2$  with TRZ-Cz compounds

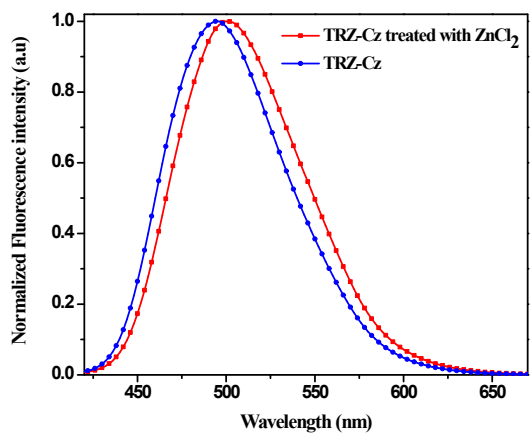

**Fig. S12** Fluorescence emission spectra of before and after treatment of ZnCl<sub>2</sub> with TRZ-Cz compounds

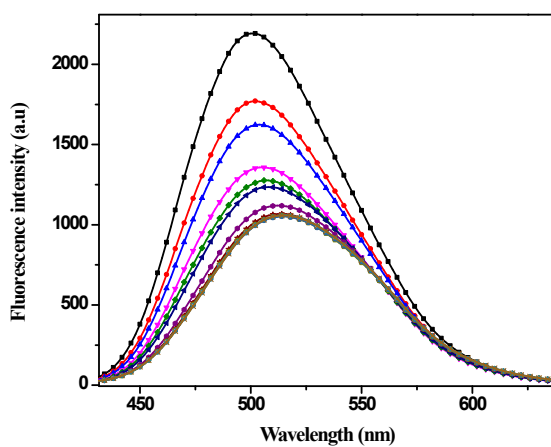

**Fig. S13** Fluorescence emission spectra of ZnCl<sub>2</sub> treated TRZ-Cz compound with PA

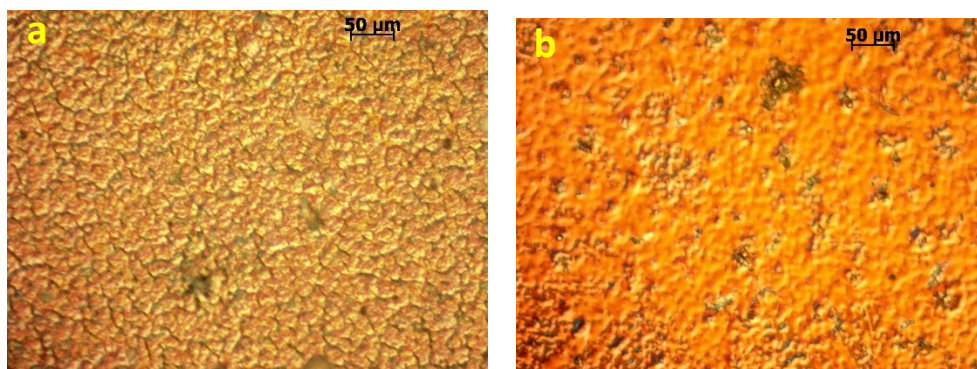

**Fig. S14** Optical microscope images TRZ-Cz compounds (a) with PA (b)
